# Supplementary material
Source: Elsevier journal article supplement (https://www.sciencedirect.com/science/article/pii/S1888989121000227)
Supplement: mmc2 [file S1888989121000227:mmc2.doc]

**APPENDIX B. List of Hospitals/programs by province.**

| **Hospital/program** | **Province** |
| --- | --- |
| Hospital Central de la Cruz Roja | Madrid |
| Hospital del Henares | Madrid |
| Hospital Gómez Ulla | Madrid |
| Hospital Puerta de Hierro Majadahonda | Madrid |
| Hospital Rey Juan Carlos | Madrid |
| Hospital Universitario La Paz | Madrid |
| Hospital Universitario Príncipe de Asturias | Madrid |
| Hospital Infanta Leonor | Madrid |
| Hospital de Badalona | Barcelona |
| Hospital Clinic | Barcelona |
| Hospital de Mataró | Barcelona |
| Hospital Santa Creu i Sant Pau | Barcelona |
| Hospital Universitari Mutua Terrassa | Barcelona |
| Hospital Duran i Reynals - Insitut Catala d'Oncologia | Barcelona |
| Hospital Vall d'Hebron | Barcelona |
| Hospital Arnau de Vilanova | Valencia |
| Hospital de Sagunto | Valencia |
| Hospital Politécnico y Universitario La Fe | Valencia |
| Hospital Universitario Doctor Peset | Valencia |
| Gerencia 061 Mallorca (cobertura a la red de AP y algunos hospitales) | Islas Baleares |
| Hospital Universitario Son Llatzer | Islas Baleares |
| Hospital Universitario Virgen del Rocio | Sevilla |
| Hospital de La Merced | Sevilla |
| Hospital Universitario Marqués de Valdecilla | Cantabria |
| Hospital de Laredo | Cantabria |
| Hospital General La Mancha Centro | Ciudad Real |
| Hospital General Universitario de Ciudad Real | Ciudad Real |
| Hospital Reina Sofía | Murcia |
| Hospital General Universitario Santa Lucia | Murcia |
| Complejo Hospitalario Universitario de Santiago | A Coruña |
| Hospital Universitario Cabueñes | Asturias |
| Servicio Extremeño de Salud (cobertura a todos los hospitales de la red) | Cáceres/Badajoz |
| Hospital San Jorge de Huesca, H Barbastro, H Jaca (programa conjunto) | Huesca |
| Hospital Marina Baixa | Alicante |
| Hospital Clínico Universitario de Salamanca | Salamanca |
| Complejo Hospitalario de Toledo | Toledo |
